# Supplementary material
Source: Research Square preprint supplement (doi:10.21203/rs.3.rs-8900945/v1)
Supplement: Supplementary file 1 [file bda4781f1c1c552bec8ee854.docx]

Appendix A. Supplementary data

| Supplemental Table S1. Procedures performed |  |  |
| --- | --- | --- |
| **Procedures Performed** | **No SZMN block (n = 46)** | **SZMN block (n = 28)** |
| Cleft Palate, No. | 7 | 2 |
| Cleft Palate and Myringotomy Tubes, No. | 19 | 11 |
| Cleft Palate and Other |  |  |
| Comprehensive dental exam, ear exam under anesthesia | 1 | 0 |
| Ear exam under anesthesia | 4 | 4 |
| Ear exam under anesthesia, auditory brainstem response testing | 1 | 0 |
| Ear exam under anesthesia, removal of tube | 1 | 0 |
| Ear exam under anesthesia, steroid injection to upper lip scar | 0 | 2 |
| Laryngoscopy, bronchoscopy | 2 | 0 |
| Laryngoscopy, bronchoscopy, ear exam under anesthesia | 2 | 0 |
| Steroid injection to upper lip scar | 0 | 1 |
| Cleft Palate, Myringotomy Tubes, and Other |  |  |
| Auditory brainstem response evaluation | 2 | 0 |
| Labial frenuloplasty | 0 | 1 |
| Laryngoscopy, bronchoscopy | 1 | 2 |
| Laryngoscopy, bronchoscopy, lingual and upper lip frenotomies | 1 | 0 |
| Laryngoscopy, bronchoscopy, nasal endoscopy | 1 | 0 |
| Pulsed dye laser to upper lip scar | 0 | 1 |
| Sleep endoscopy | 0 | 1 |
| Sleep endoscopy, laryngoscopy, bronchoscopy | 0 | 2 |
| Sleep endoscopy, laryngoscopy, bronchoscopy, frenectomy | 1 | 0 |
| Sphincter pharyngoplasty and furlow palatoplasty | 1 | 0 |
| Steroid injection to upper lip scar | 2 | 1 |
